# Supplementary material
Source: publisher figshare collection journal article supplement (https://acs.figshare.com/ndownloader/files/4273748)
Supplement: Supplementary file 1 [file 4273748]

*Supporting Information*

Hybrid Cell Adhesive Material for Instant  
Dielectrophoretic Cell Trapping and Long-Term Cell  
Function Assessment

*Darwin R. Reyes,<sup>\*,†</sup> Jennifer S. Hong,<sup>†</sup> John T. Elliott,<sup>‡</sup> Michael Gaitan<sup>†</sup>*

<sup>†</sup>Semiconductor Electronics Division, National Institute of Standards and Technology, 100 Bureau Drive, MS 8120, Gaithersburg, Maryland 20899-8120 and <sup>‡</sup>Biochemical Science Division, National Institute of Standards and Technology, 100 Bureau Drive, MS 8313, Gaithersburg, MD 20899-8313

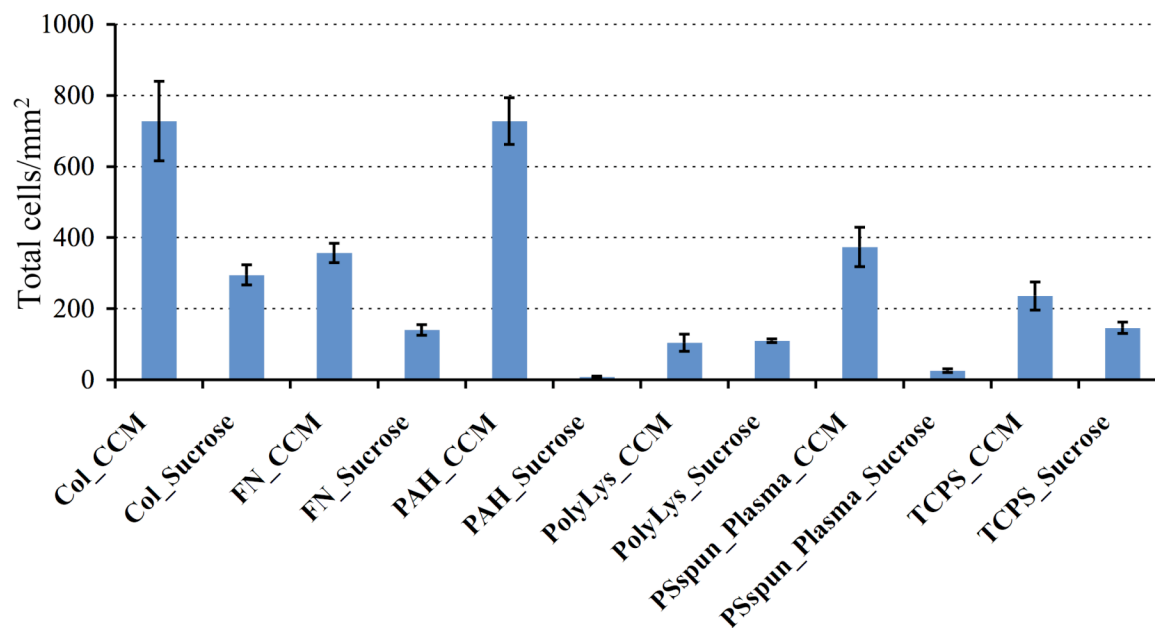

Supporting Figure S11. Total density of P19 cells on test substrates after 24h in complete cell culture media (CCM). Cells were seeded in 320 mM sucrose or cell culture media and incubated with the test substrate for 15 min. The incubation solution was removed before addition of media for the 24h culture. Cells were fixed and imaged with phase microscopy. The number of spread and rounded cells were counted on 4 regions of a wide field representative image and the fraction of rounded cells to total cells were calculated. Col=collagen I, FN=fibronectin, PAH=poly, polyLys=poly lysine, PSspun\_Plasma=spun cast polystyrene and plasma treatment, TCPS=tissue culture polystyrene.

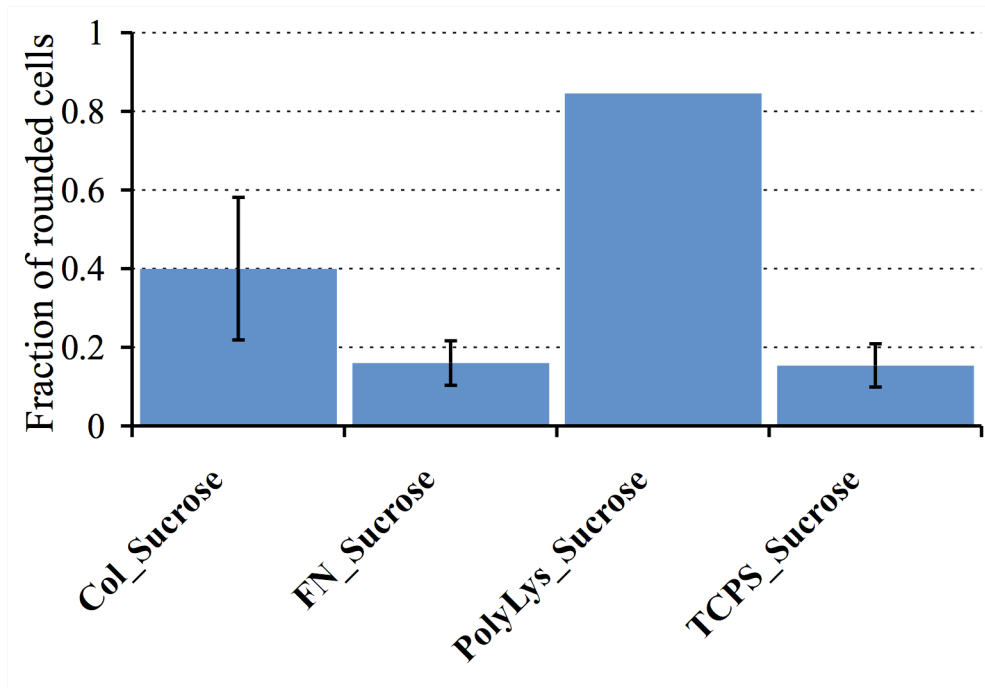

Supporting Figure SI2. Fraction of rounded cells on test substrates after seeding in 320 mM sucrose. Rounded cells were considered to be unhealthy cells. The fraction of round cells on both the polyLys and Col surfaces were notably higher than the fraction of rounded cells on the FN and TCPS surfaces. The FN adhesion surface was selected for constructing the hybrid cell adhesion layer. The error bar for PolyLys\_Sucrose was not estimated since there were only 6 well-adhered cells in the field that was examined.

Seeded in:

**CCM**

**Sucrose**

**TCPS**  
(6-well plate)

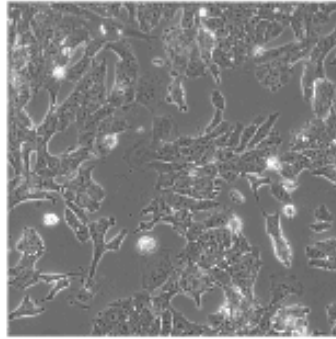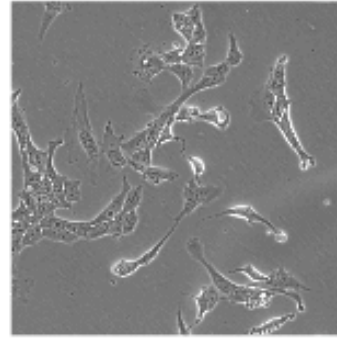

**PS**  
(Spin-coated,  
oxidized and  
CCM pretreated)

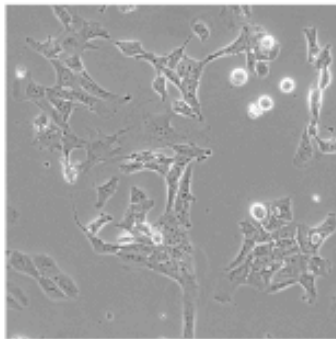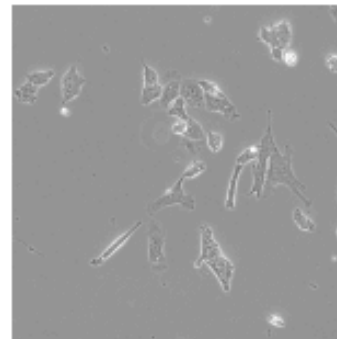

**PS**  
(Spin-coated and  
oxidized)

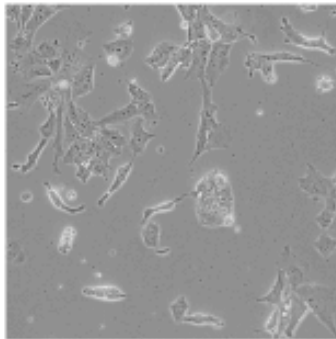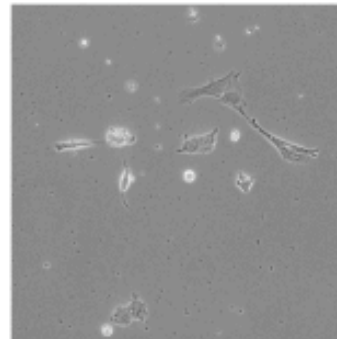

**PEMs**

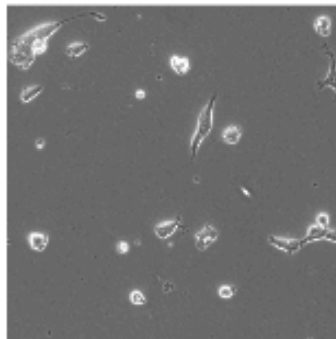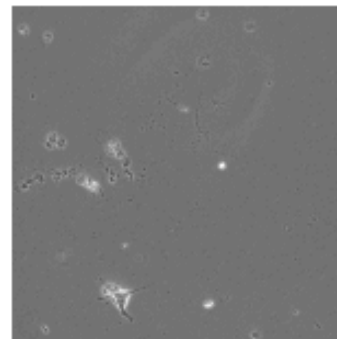

Supporting Figure SI3a. Representative micrographs of P19 cells 24 h after seeded on different PS surfaces and on PEMs. Cells were suspended in CCM and sucrose.

Seeded in:

**CCM**

**Sucrose**

Poly-L-  
Lysine

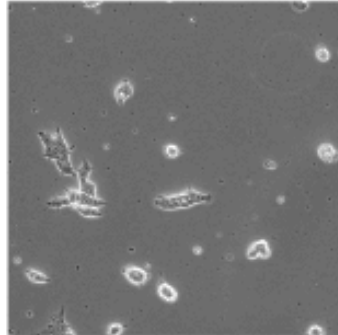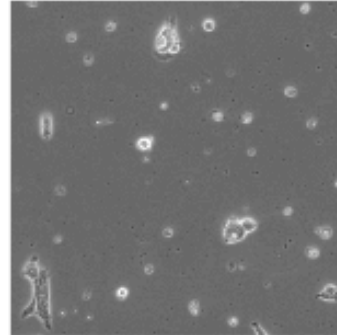

Fibronectin

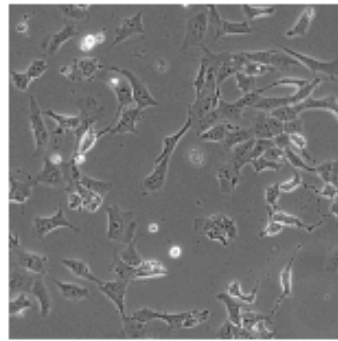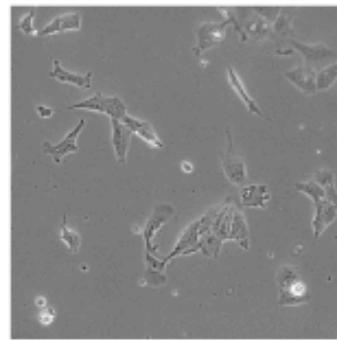

Collagen I

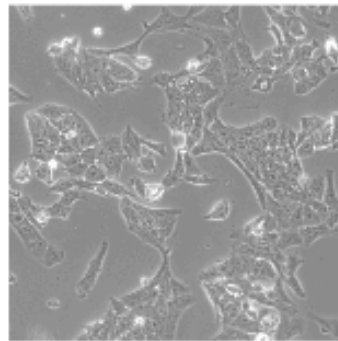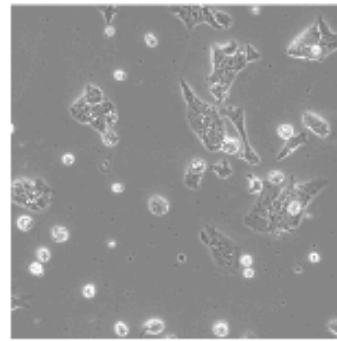

Supporting Figure SI3b. Representative micrographs of P19 cells 24 h after seeded on Poly-L-Lysine, FN, and Collagen I surfaces. Cells were suspended in CCM and sucrose.
